# Supplementary material for: Three Groups of Transposable Elements with Contrasting Copy Number Dynamics and Host Responses in the Maize (Zea mays ssp. mays) Genome
Source: PLoS Genet. 2014 Apr 17;10(4):e1004298. doi: 10.1371/journal.pgen.1004298 (PMC3990487; doi:10.1371/journal.pgen.1004298)
Supplement: Table S3 — The Genbank references of the sequences in the Knob and CentC reference database. (XLSX) [file pgen.1004298.s006.xlsx]

## Sheet: Knob+CentC
Table S3. The Genbank references of the sequences in the Knob and CentC reference database
Genebank Ref.	Description
AF030934.1	Zea_mays_180-bp_knob-associated_tandem_repeat_1-T3-1
AF030935.1	Zea_mays_180-bp_knob-associated_tandem_repeat_1-T3-2
AF030936.1	Zea_mays_180-bp_knob-associated_tandem_repeat_1-T7-1
AF030937.1	Zea_mays_180-bp_knob-associated_tandem_repeat_1-T7-2
AF030938.1	Zea_mays_180-bp_knob-associated_tandem_repeat_15-T3-1
AF030939.1	Zea_mays_180-bp_knob-associated_tandem_repeat_15-T3-2
AF030940.1	Zea_mays_180-bp_knob-associated_tandem_repeat_15-T7-1
M32533.1	Zea_mays_subsp._mexicana_180-bp_knob-specific
M32534.1	Zea_mays_subsp._mexicana_180-bp_knob-specific
DQ186872.1	Zea_mays_clone_weo186_knob-associated_repetitive_sequence
DQ186871.1	Zea_mays_clone_weo190_Tr-1_knob_repetitive_sequence
AF071127.1	Zea_mays_knob-associated_clustered
AF071125.1	Zea_mays_knob-associated_clustered_repeat_TR1-310-265
AF071121.1	Zea_mays_knob-associated_clustered_repeat_TR1-340
AF071122.1	Zea_mays_knob-associated_clustered_repeat_TR1-353
AF071123.1	Zea_mays_knob-associated_clustered_repeat_TR1-357
AF071124.1	Zea_mays_knob-associated_clustered_repeat_TR1-358
AF071126.1	Zea_mays_knob-associated_clustered_repeat_TR1-723
M35408.1	MZEHETRO_Corn_heterochromatin_repetitive_DNA
M32521.1	MZEZMA_Maize_180-bp_knob-specific
M32522.1	MZEZMB_Maize_180-bp_knob-specific
M32523.1	MZEZMC_Maize_180-bp_knob-specific
M32524.1	MZEZMD_Maize_180-bp_knob-specific
M32525.1	MZEZME_Maize_180-bp_knob-specific
M32526.1	MZEZMF_Maize_180-bp_knob-specific
M32527.1	MZEZMG_Maize_180-bp_knob-specific
M32528.1	MZEZMH_Maize_180-bp_knob-specific
M32529.1	MZEZMI_Maize_180-bp_knob-specific
M32530.1	MZEZMJ_Maize_180-bp_knob-specific
M32531.1	MZEZMK_Maize_180-bp_knob-specific
M32532.1	MZEZML_Maize_180-bp_knob-specific
DQ352544.1	Zea_mays_180-bp_knob-associated_tandem_repeat_MK180
AY173950.1	Zea_mays_B_chromosome_centromere
AY530216.1	Zea_mays_clone_CentC1_centromeric
AY530225.1	Zea_mays_clone_CentC10_centromeric
AY530226.1	Zea_mays_clone_CentC11_centromeric
AY530227.1	Zea_mays_clone_CentC12_centromeric
AY530228.1	Zea_mays_clone_CentC13_centromeric
AY530229.1	Zea_mays_clone_CentC14_centromeric
AY530230.1	Zea_mays_clone_CentC15_centromeric
AY530231.1	Zea_mays_clone_CentC16_centromeric
AY530232.1	Zea_mays_clone_CentC17_centromeric
AY530233.1	Zea_mays_clone_CentC18_centromeric
AY530234.1	Zea_mays_clone_CentC19_centromeric
AY530217.1	Zea_mays_clone_CentC2_centromeric
AY530235.1	Zea_mays_clone_CentC20_centromeric
AY530236.1	Zea_mays_clone_CentC21_centromeric
AY530237.1	Zea_mays_clone_CentC22_centromeric
AY530238.1	Zea_mays_clone_CentC23_centromeric
AY530239.1	Zea_mays_clone_CentC24_centromeric
AY530240.1	Zea_mays_clone_CentC25_centromeric
AY530241.1	Zea_mays_clone_CentC26_centromeric
AY530242.1	Zea_mays_clone_CentC27_centromeric
AY530243.1	Zea_mays_clone_CentC28_centromeric
AY530244.1	Zea_mays_clone_CentC29_centromeric
AY530218.1	Zea_mays_clone_CentC3_centromeric
AY530245.1	Zea_mays_clone_CentC30_centromeric
AY530246.1	Zea_mays_clone_CentC31_centromeric
AY530247.1	Zea_mays_clone_CentC32_centromeric
AY530248.1	Zea_mays_clone_CentC33_centromeric
AY530249.1	Zea_mays_clone_CentC34_centromeric
AY530250.1	Zea_mays_clone_CentC35_centromeric
AY530251.1	Zea_mays_clone_CentC36_centromeric
AY530252.1	Zea_mays_clone_CentC37_centromeric
AY530253.1	Zea_mays_clone_CentC38_centromeric
AY530254.1	Zea_mays_clone_CentC39_centromeric
AY530219.1	Zea_mays_clone_CentC4_centromeric
AY530255.1	Zea_mays_clone_CentC40_centromeric
AY530256.1	Zea_mays_clone_CentC41_centromeric
AY530257.1	Zea_mays_clone_CentC42_centromeric
AY530258.1	Zea_mays_clone_CentC43_centromeric
AY530259.1	Zea_mays_clone_CentC44_centromeric
AY530260.1	Zea_mays_clone_CentC45_centromeric
AY530261.1	Zea_mays_clone_CentC46_centromeric
AY530262.1	Zea_mays_clone_CentC47_centromeric
AY530263.1	Zea_mays_clone_CentC48_centromeric
AY530264.1	Zea_mays_clone_CentC49_centromeric
AY530220.1	Zea_mays_clone_CentC5_centromeric
AY530265.1	Zea_mays_clone_CentC50_centromeric
AY530266.1	Zea_mays_clone_CentC51_centromeric
AY530267.1	Zea_mays_clone_CentC52_centromeric
AY530268.1	Zea_mays_clone_CentC53_centromeric
AY530269.1	Zea_mays_clone_CentC54_centromeric
AY530270.1	Zea_mays_clone_CentC55_centromeric
AY530271.1	Zea_mays_clone_CentC56_centromeric
AY530272.1	Zea_mays_clone_CentC57_centromeric
AY530273.1	Zea_mays_clone_CentC58_centromeric
AY530274.1	Zea_mays_clone_CentC59_centromeric
AY530221.1	Zea_mays_clone_CentC6_centromeric
AY530275.1	Zea_mays_clone_CentC60_centromeric
AY530276.1	Zea_mays_clone_CentC61_centromeric
AY530277.1	Zea_mays_clone_CentC62_centromeric
AY530278.1	Zea_mays_clone_CentC63_centromeric
AY530279.1	Zea_mays_clone_CentC64_centromeric
AY530280.1	Zea_mays_clone_CentC65_centromeric
AY530281.1	Zea_mays_clone_CentC66_centromeric
AY530282.1	Zea_mays_clone_CentC67_centromeric
AY530283.1	Zea_mays_clone_CentC68_centromeric
AY530284.1	Zea_mays_clone_CentC69_centromeric
AY530222.1	Zea_mays_clone_CentC7_centromeric
AY530285.1	Zea_mays_clone_CentC70_centromeric
AY530286.1	Zea_mays_clone_CentC71_centromeric
AY530287.1	Zea_mays_clone_CentC72_centromeric
AY530223.1	Zea_mays_clone_CentC8_centromeric
AY530224.1	Zea_mays_clone_CentC9_centromeric
